# Supplementary material for: Deep Parallel Characterization of AAV Tropism and AAV-Mediated Transcriptional Changes via Single-Cell RNA Sequencing
Source: PubMed Central journal article supplement (PMC8574206; doi:10.3389/fimmu.2021.730825), 2021-10-21
Supplement: DataSheet_2.pdf [file DataSheet_2.pdf]

## Supplemental Tables

**Supplemental Table 1. Primers.** Primers used for round 1 and round 2 amplification of viral transcripts. Primers with TC1 and TC2 in the amplicon name indicate they were used only for those samples.

| <b>Amplicon</b>           | <b>Read</b> | <b>Round</b> | <b>Sequence (Ns indicate Illumina sample index)</b>                                                  |
|---------------------------|-------------|--------------|------------------------------------------------------------------------------------------------------|
| <b>All Viruses</b>        | 1           | 1            | CTACACGACGCTCTTCCGATCT                                                                               |
| <b>All Viruses</b>        | 1           | 2            | AATGATACGGCGACCACCGAGATCTACACTCTTTCC<br>CTACACGACGCTCTTCCGAT                                         |
| <b>mNeonGreen<br/>TC1</b> | 2           | 1            | TTCAAGGAGTGGCAAAGGCCTTTACCGATGTGAT                                                                   |
| <b>mRuby2</b>             | 2           | 1            | CAACGGGAACATGCAGTTGCCAAGTTTGCTGG                                                                     |
| <b>mNeonGreen</b>         | 2           | 1            | TAACTATCTGAAGAACCAGCCGATGTAC                                                                         |
| <b>tdTomato TC2</b>       | 2           | 1            | AGGACTACACAATTGTCTGAACAGTATGAG                                                                       |
| <b>tdTomato</b>           | 2           | 1            | ACAACGAGGACTACACCATCGTGG                                                                             |
| <b>mCherry</b>            | 2           | 1            | CATCGTGGAACAGTACGAACG                                                                                |
| <b>WPRE</b>               | 2           | 2            | CAAGCAGAAGACGGCATAACGAGATNNNNNNNNNGT<br>GACTGGAGTTCAGACGTGTGCTCTTCCGATCTAGAC<br>GAGTCGGATCTCCCT      |
| <b>mNeonGreen</b>         | 2           | 2            | CAAGCAGAAGACGGCATAACGAGATNNNNNNNNNGT<br>GACTGGAGTTCAGACGTGTGCTCTTCCGATCTTTCA<br>AGGAGTGGCAAAGGC      |
| <b>mRuby2</b>             | 2           | 2            | CAAGCAGAAGACGGCATAACGAGATNNNNNNNNNGT<br>GACTGGAGTTCAGACGTGTGCTCTTCCGATCTCAAC<br>GGGAACATGCAGTTGC     |
| <b>tdTomato TC2</b>       | 2           | 2            | CAAGCAGAAGACGGCATAACGAGATNNNNNNNNNGT<br>GACTGGAGTTCAGACGTGTGCTCTTCCGATCTGCAT<br>GGACGAGCTGTACAAG     |
| <b>tdTomato</b>           | 2           | 2            | CAAGCAGAAGACGGCATAACGAGATNNNNNNNNNGT<br>GACTGGAGTTCAGACGTGTGCTCTTCCGATCTCCTC<br>TTTCTCTATGGGATGGATGA |

|         |   |   |                                                                                              |
|---------|---|---|----------------------------------------------------------------------------------------------|
| mCherry | 2 | 2 | CAAGCAGAAGACGGCATAACGAGATNNNNNNNNGT<br>GACTGGAGTTCAGACGTGTGCTCTTCCGATCTCGGC<br>ATGGACGAGCTGT |
|---------|---|---|----------------------------------------------------------------------------------------------|

**Supplemental Table 2. Marker Genes.**

| Cell Type               | Marker Gene(s)                    |
|-------------------------|-----------------------------------|
| Astrocytes              | Aldh111 (168), Sox9 (169)         |
| Neurons                 | Rbfox3 (170)                      |
| Vascular Cells          | Cldn5 (171)                       |
| Endothelial Cells       | Slc2a1 (172)                      |
| Pericytes               | Pdgfrb (173), Rgs5, Abcc9 (100)   |
| Red Blood Cells         | Hba-a1, Hba-a2 (174)              |
| Vascular SMCs           | Acta2, Myh11, Tagln (175)         |
| Vascular LMCs           | Fam180a, Slc6a13, Dcn, Ptgds (61) |
| Microglia               | Cx3cr1, Tmem119 (109)             |
| Leukocytes              | Itgal, Gzma (75)                  |
| Perivascular Macropages | Mrc1 (109)                        |
| Oligodendrocytes        | Olig2 (176)                       |
| OPCs                    | Pdgfra, Cspg4 (177)               |
| Mature Oligos           | Mog, Mbp (178)                    |
| Committed Oligos        | Ptprz1, Bmp4, Nkx2-2, Vcan (61)   |

**Supplemental Table 3. scVI Hyperparameter Tuning**

| Dispersion | Latent Lib Size | # Latent | # Layers | # Hidden | Test KL Divergence |
|------------|-----------------|----------|----------|----------|--------------------|
| Gene       | False           | 10       | 1        | 128      | 5366.4             |

|                   |       |    |   |      |        |
|-------------------|-------|----|---|------|--------|
| <b>Gene-batch</b> | True  | 10 | 1 | 128  | 5406.1 |
| <b>Gene</b>       | True  | 10 | 1 | 128  | 5391.0 |
| <b>Gene-batch</b> | True  | 50 | 2 | 512  | 5362.6 |
| <b>Gene-batch</b> | False | 10 | 1 | 128  | 5378.7 |
| <b>Gene</b>       | False | 25 | 1 | 128  | 5354.6 |
| <b>Gene</b>       | False | 25 | 2 | 256  | 5337.8 |
| <b>Gene</b>       | False | 20 | 2 | 256  | 5336.7 |
| <b>Gene</b>       | False | 40 | 4 | 1024 | 5338.0 |

*Supplemental Table 4. Sample Metadata. Supplemental file contains the following fields.*

| <i>Field Name</i>                     | <i>Description</i>                                                                                     |
|---------------------------------------|--------------------------------------------------------------------------------------------------------|
| <b>10X Version</b>                    | Whether the sample was processed using 10X V2 or V3 chemistry                                          |
| <b>Animal ID</b>                      | A unique animal identifier. Some animals provided multiple samples                                     |
| <b>Target # Cells</b>                 | The target number of cells for extraction. 1.6X this number is loaded into the 10X Chromium instrument |
| <b>Recovered Cells</b>                | The number of cells recovered, after debris and multiplet filtering                                    |
| <b>Typed Cells</b>                    | The number of cells typed after neuronal and non-neuronal cell assignment                              |
| <b>Cell Ranger # Cells</b>            | The number of cells as predicted by Cell Ranger                                                        |
| <b>Predicted Multiplets</b>           | The number of predicted multiplets                                                                     |
| <b>Transcriptome Sequencing Depth</b> | The number of reads                                                                                    |
| <b>Transcriptome Reads/Cell</b>       | The number of reads divided by the number of recovered cells                                           |
| <b>Median UMIs/Cell</b>               | Of the recovered cells, the median total UMI count                                                     |

|                                         |                                                                                                                                                                                |
|-----------------------------------------|--------------------------------------------------------------------------------------------------------------------------------------------------------------------------------|
| <b>Median Genes/Cell</b>                | Of the recovered cells, the median number of genes detected with at least one transcript                                                                                       |
| <b>Variants Recovered</b>               | Which variants were recovered from this sample. Samples labeled “Cell Typing Only” were not used for tropism or immune analysis, but were included in the cell type classifier |
| <b>Virus Sequencing Depth</b>           | The number of reads of the amplified viral transcripts across all templates                                                                                                    |
| <b>Virus Reads/Cell</b>                 | The read depth of the amplified viral transcripts                                                                                                                              |
| <b>Age at Extraction (Days)</b>         | The age of the animal at extraction time                                                                                                                                       |
| <b>Virus Incubation Time (Days)</b>     | How many days prior to extraction the animal was injected                                                                                                                      |
| <b>Percent of Virus UMIs Determined</b> | What percent of transcriptome reads that aligned to the virus gene were disambiguated from the amplified lookup table                                                          |

*Supplemental Table 5. Variant Barcodes*

| <b>Variant</b>     | <b>Cargo</b>            | <b>Barcodes</b>                    |
|--------------------|-------------------------|------------------------------------|
| <b>AAV-PHP.eB</b>  | pAAV:CAG-NLS-mNeonGreen |                                    |
| <b>AAV-PHP.V1</b>  | pAAV:CAG-NLS-mRuby2     |                                    |
| <b>AAV-PHP.eB</b>  | pAAV:CAG-NLS-mNeonGreen | CCTGACA, GGACAGA, GCACAGA, CGAGAGA |
| <b>AAV-PHP.V1</b>  | pAAV:CAG-tdTomato       |                                    |
| <b>AAV-PHP.V1</b>  | pAAV:CAG-NLS-mNeonGreen | CAGTGTC, GAGAGTG, GTGTGAG          |
| <b>AAV-CAP-B10</b> | pAAV:CAG-NLS-mNeonGreen |                                    |
| <b>AAV-PHP.eB</b>  | pAAV:CAG-NLS-tdTomato   |                                    |
| <b>AAV-CAP-B10</b> | pAAV:CAG-NLS-tdTomato   |                                    |

|                    |                            |                                                                          |
|--------------------|----------------------------|--------------------------------------------------------------------------|
| <b>AAV9</b>        | UBC-mCherry-AAV-cap-in-cis | CGTCTCAGCTATAACTTCCAA<br>CGAGGTCGTAAGGTCGGCATT<br>TGATTATCATGCCTGCTCAGG  |
| <b>AAV-PHP.B</b>   | UBC-mCherry-AAV-cap-in-cis | TATACCCAACCACTCAGTCCC<br>CGGTTTTAGCACGGCCATAGA<br>AAGCGATGTCTCTACACGATA  |
| <b>AAV-PHP.eB</b>  | UBC-mCherry-AAV-cap-in-cis | TACAGCTTTTTGACTGGAGGT<br>CTGGCATTAAATACGCGGGTCA<br>TACAGGTCCTAGACAGGTGAT |
| <b>AAV-CAP-B10</b> | UBC-mCherry-AAV-cap-in-cis | GCTGGGCGTTAAAGTACTCGC<br>GCAACTGGGATAATCGTAGTC<br>AACGGAGTGAACGGACCCTAG  |
| <b>AAV-PHP.V1</b>  | UBC-mCherry-AAV-cap-in-cis | GTGGCGGGTTTCCGAAAAAGT<br>TCGTCCGCACTCTCTTAGAGC<br>CATGTGATAGTGAAGCACGCC  |
| <b>AAV-PHP.C1</b>  | UBC-mCherry-AAV-cap-in-cis | TCTGTGCTGCTCTTCTAACAA<br>TCTGACGGCGGGTAAACACTG<br>TGGCCACCCGCAGAGTATACT  |
| <b>AAV-PHP.C2</b>  | UBC-mCherry-AAV-cap-in-cis | GACTAGGGTAAGTGAGCTATG<br>CGAATTTCTTCCATACCTCCT<br>TAGTGCCAACAACGGAGAAGA  |

**Supplemental Table 6. Cell Metadata.** Supplemental file contains one row per cell, with the following fields.

| <b>Field Name</b> | <b>Description</b>                                                          |
|-------------------|-----------------------------------------------------------------------------|
| <b>Cell ID</b>    | The cell barcode plus a sample index                                        |
| <b>Cell Type</b>  | The final cell type of this cell                                            |
| <b>AAV</b>        | The number of UMIs in this cell that align to the custom AAV reference gene |

|                       |                                                                                                  |
|-----------------------|--------------------------------------------------------------------------------------------------|
| <b>CCN202105041</b>   | The predicted output of this cell from the droplet classifier – neurons vs non-neurons           |
| <b>p_CCN202105041</b> | The probability of classification of this droplet type                                           |
| <b>CCN202105050</b>   | The predicted neuronal subtype of this cell, if it is a neuron                                   |
| <b>p_CCN202105050</b> | The probability of classification of this neuron subtype                                         |
| <b>CCN202105051</b>   | The named non-neuronal subtype of this cell, if it is a non-neuron                               |
| <b>c_CCN202105051</b> | The cluster this cell was assigned to in the non-neuronal model                                  |
| <b>X_CCN202105051</b> | The x-coordinate of a t-SNE projection of this cell in the non-neuronal model                    |
| <b>Y_CCN202105051</b> | The y-coordinate of a t-SNE projection of this cell in the non-neuronal model                    |
| <b>CCN202105070</b>   | The cluster assignment of this cell in the joint neuronal and non-neuronal model                 |
| <b>X_CCN202105070</b> | The x-coordinate of a t-SNE projection of this cell in the joint neuronal and non-neuronal model |
| <b>Y_CCN202105070</b> | The y-coordinate of a t-SNE projection of this cell in the joint neuronal and non-neuronal model |
| <b>Cell Set</b>       | The origin cell set of this cell                                                                 |
| <b>[Variant]</b>      | The number of UMIs in this cell that are associated with the given barcoded AAV variant          |

**Supplemental Table 7. Transduction Rates by Cell Type.** Supplemental file contains one row per unique variant in each cell set.

| <b>Field Name</b> | <b>Description</b>                                                                                                                                     |
|-------------------|--------------------------------------------------------------------------------------------------------------------------------------------------------|
| <b>Entry Id</b>   | {Cell Set}-{Variant}                                                                                                                                   |
| <b>Cell Set</b>   | The source cell set                                                                                                                                    |
| <b>Virus</b>      | Which variant this row describes. Note: “AAV” means the transduction rate of any AAV present in the sample, as determined by a read’s alignment to the |

|                                      |                                                                          |
|--------------------------------------|--------------------------------------------------------------------------|
|                                      | custom AAV gene. All other variants originate from disambiguated counts. |
| <b>[Cell Type] Transduction Rate</b> | The estimated transduction rate of this variant in this cell type        |
| <b>[Cell Type] Num Cells</b>         | The number of total cells of this type in this cell set                  |
| <b>Field Name</b>                    | Description                                                              |

**Supplemental Table 8. Differentially Expressed Genes Across Time Points.** Supplemental file contains one tab per cell type, with the following fields.

| <b>Field Name</b>       | <b>Description</b>                             |
|-------------------------|------------------------------------------------|
| <b>Gene ID</b>          | The Ensembl Gene ID                            |
| <b>Gene name</b>        | The canonical gene name                        |
| <b>Mean expression</b>  | The mean expression of this gene in this group |
| <b>L2FC</b>             | The log fold change of this gene               |
| <b>L2FC SE</b>          | The standard error of the L2FC                 |
| <b>Stat</b>             | The stat, as reported by DESeq2                |
| <b>P-value</b>          | The unadjusted P-value                         |
| <b>Adjusted P-value</b> | The adjusted P-value                           |

## References

169. Sun W, Cornwell A, Li J, Peng S, Osorio MJ, Aalling N, et al. SOX9 Is an Astrocyte-Specific Nuclear Marker in the Adult Brain Outside the Neurogenic Regions. *J Neurosci.* 2017 Apr 26;37(17):4493–507.
170. Lin Y-S, Wang H-Y, Huang D-F, Hsieh P-F, Lin M-Y, Chou C-H, et al. Neuronal Splicing Regulator RBFOX3 (NeuN) Regulates Adult Hippocampal Neurogenesis and Synaptogenesis. Borlongan CV, editor. *PLoS ONE.* 2016 Oct 4;11(10):e0164164.
171. Song HW, Foreman KL, Gastfriend BD, Kuo JS, Palecek SP, Shusta EV. Transcriptomic comparison of human and mouse brain microvessels. *Sci Rep.* 2020 Dec;10(1):12358.
172. Veys K, Fan Z, Ghobrial M, Bouché A, García-Caballero M, Vriens K, et al. Role of the GLUT1 Glucose Transporter in Postnatal CNS Angiogenesis and Blood-Brain Barrier Integrity. *Circ Res.* 2020 Jul 31;127(4):466–82.

173. Winkler EA, Bell RD, Zlokovic BV. Pericyte-specific expression of PDGF beta receptor in mouse models with normal and deficient PDGF beta receptor signaling. *Mol Neurodegeneration*. 2010;5(1):32.
174. Capellera-Garcia S, Pulecio J, Dhulipala K, Siva K, Rayon-Estrada V, Singbrant S, et al. Defining the Minimal Factors Required for Erythropoiesis through Direct Lineage Conversion. *Cell Reports*. 2016 Jun;15(11):2550–62.
175. Chasseigneaux S, Moraca Y, Cochois-Guégan V, Boulay A-C, Gilbert A, Le Crom S, et al. Isolation and differential transcriptome of vascular smooth muscle cells and mid-capillary pericytes from the rat brain. *Sci Rep*. 2018 Dec;8(1):12272.
176. Dai J, Bercery KK, Ahrendsen JT, Macklin WB. Olig1 Function Is Required for Oligodendrocyte Differentiation in the Mouse Brain. *Journal of Neuroscience*. 2015 Mar 11;35(10):4386–402.
177. Suzuki N, Sekimoto K, Hayashi C, Mabuchi Y, Nakamura T, Akazawa C. Differentiation of Oligodendrocyte Precursor Cells from Sox10-Venus Mice to Oligodendrocytes and Astrocytes. *Sci Rep*. 2017 Dec;7(1):14133.
178. Miron VE, Kuhlmann T, Antel JP. Cells of the oligodendroglial lineage, myelination, and remyelination. *Biochimica et Biophysica Acta (BBA) - Molecular Basis of Disease*. 2011 Feb;1812(2):184–93.
