# Supplementary material for: Deep Parallel Characterization of AAV Tropism and AAV-Mediated Transcriptional Changes via Single-Cell RNA Sequencing
Source: Front Immunol. 2021 Oct 21;12:730825. doi: 10.3389/fimmu.2021.730825 (PMC8574206; doi:10.3389/fimmu.2021.730825)
Supplement: Supplementary file 4 [file DataSheet_4.csv]

	Gene Name	0	1	2	3	4	5	6	7	8	9	10	11	12	13	14	15	16	17	18	19	20	21	22	23	24	25	26	27	28	29	30	31	32	33
ENSMUSG00000030088	Aldh1l1	True	False	False	False	False	False	False	False	False	False	False	False	False	False	False	False	False	False	False	False	False	False	False	False	False	True	False	False	False	False	False	False	False	False
ENSMUSG00000000567	Sox9	True	False	False	False	False	False	False	False	False	False	False	False	False	False	False	False	False	True	False	False	False	False	False	False	False	True	False	False	False	False	False	False	False	False
ENSMUSG00000033208	S100b	True	False	False	False	False	False	True	False	False	False	False	False	False	False	False	False	False	True	False	True	False	True	False	False	True	True	False	False	False	False	False	False	False	False
ENSMUSG00000041378	Cldn5	False	False	True	False	False	False	False	False	False	False	False	False	False	False	False	True	False	False	False	False	False	False	False	False	False	False	False	False	False	False	False	False	False	False
ENSMUSG00000028645	Slc2a1	False	False	True	False	False	False	False	False	False	False	False	False	False	False	False	True	False	False	False	False	False	False	False	False	False	False	False	False	False	False	False	False	False	False
ENSMUSG00000024620	Pdgfrb	False	False	False	False	False	False	False	False	False	False	False	False	False	True	False	True	False	False	False	False	False	False	True	False	False	False	False	False	False	False	False	False	False	False
ENSMUSG00000026678	Rgs5	False	False	True	False	False	False	False	False	False	False	False	False	False	True	False	True	False	False	False	False	False	False	False	False	False	False	False	False	False	False	False	False	False	False
ENSMUSG00000030249	Abcc9	False	False	True	False	False	False	False	False	False	False	False	False	False	True	False	True	False	False	False	False	False	False	False	False	False	False	False	False	False	False	False	False	False	False
ENSMUSG00000069919	Hba-a1	False	False	False	False	False	False	False	False	False	False	False	False	False	False	False	False	False	False	False	False	False	False	False	False	False	False	True	False	False	False	False	False	False	False
ENSMUSG00000069917	Hba-a2	False	False	False	False	False	False	False	False	False	False	False	False	False	False	False	False	False	False	False	False	False	False	False	False	False	False	True	False	False	False	False	False	False	False
ENSMUSG00000035783	Acta2	False	False	False	False	False	False	False	False	False	False	False	False	False	True	False	True	False	False	False	False	False	False	False	False	False	False	False	False	False	False	False	False	False	False
ENSMUSG00000018830	Myh11	False	False	False	False	False	False	False	False	False	False	False	False	False	True	False	True	False	False	False	False	False	False	False	False	False	False	False	False	False	False	False	False	False	False
ENSMUSG00000032085	Tagln	False	False	False	False	False	False	False	False	False	False	False	False	False	True	False	True	False	False	False	False	False	False	True	False	False	False	False	False	False	False	False	False	False	False
ENSMUSG00000047420	Fam180a	False	False	False	False	False	False	False	False	False	False	False	False	False	False	False	False	False	False	False	False	False	False	True	False	False	False	False	False	False	False	False	False	False	False
ENSMUSG00000030108	Slc6a13	False	False	False	False	False	False	False	False	False	False	False	False	False	False	False	True	False	False	False	False	False	False	True	False	False	False	False	False	False	False	False	False	False	False
ENSMUSG00000019929	Dcn	False	False	False	False	False	False	False	False	False	False	False	False	False	False	False	False	False	False	False	False	False	False	True	False	False	False	False	False	False	False	False	False	False	False
ENSMUSG00000015090	Ptgds	False	True	False	False	False	False	False	False	False	False	False	False	False	False	False	False	False	False	False	False	False	True	True	True	False	False	False	False	False	False	False	False	True	False
ENSMUSG00000052336	Cx3cr1	False	False	False	True	False	False	False	False	False	False	False	False	False	False	False	False	False	False	False	False	False	False	False	False	False	False	False	False	False	False	False	False	False	False
ENSMUSG00000054675	Tmem119	False	False	False	True	False	False	False	False	False	False	False	False	False	False	False	False	False	False	False	False	False	False	True	False	False	False	False	False	False	False	False	False	False	False
ENSMUSG00000030830	Itgal	False	False	False	False	False	False	False	False	False	False	False	False	False	False	False	False	False	True	False	False	False	False	False	False	False	False	False	True	True	False	False	False	False	False
ENSMUSG00000023132	Gzma	False	False	False	False	False	False	False	False	False	False	False	False	False	False	False	False	False	False	False	False	False	False	False	False	False	False	False	True	False	False	False	False	False	False
ENSMUSG00000026712	Mrc1	False	False	False	True	False	False	False	False	False	False	False	False	False	False	False	False	False	False	False	False	False	False	False	False	False	False	False	True	False	False	False	False	False	False
ENSMUSG00000025576	Rbfox3	False	False	False	False	True	True	False	True	True	True	False	True	True	False	True	False	True	True	True	False	True	False	False	False	True	False	False	False	True	True	False	True	False	False
ENSMUSG00000039830	Olig2	False	True	False	False	False	False	True	False	False	False	False	False	False	False	False	False	False	False	False	True	False	True	False	True	False	False	False	False	False	False	False	False	False	False
ENSMUSG00000029231	Pdgfra	False	False	False	False	False	False	True	False	False	False	False	False	False	False	False	False	False	False	False	True	False	True	True	False	False	False	False	False	False	False	False	False	False	False
ENSMUSG00000032911	Cspg4	False	False	False	False	False	False	True	False	False	False	False	False	False	True	False	True	False	False	False	False	False	False	False	False	False	False	False	False	False	False	False	False	False	False
ENSMUSG00000076439	Mog	False	True	False	False	False	False	False	False	False	False	False	False	False	False	False	False	False	False	False	False	False	True	False	True	False	False	False	False	False	False	False	False	True	False
ENSMUSG00000041607	Mbp	False	True	False	False	False	False	False	True	False	False	False	False	False	False	False	False	False	True	False	False	False	True	False	True	True	False	False	False	False	True	False	False	True	False
ENSMUSG00000068748	Ptprz1	True	False	False	False	False	False	True	False	False	True	False	False	False	False	False	False	False	False	False	True	False	True	False	False	False	True	False	False	False	True	False	False	False	False
ENSMUSG00000021835	Bmp4	False	False	False	False	False	False	False	False	False	False	False	False	False	False	False	True	False	False	False	False	False	True	True	False	False	False	False	False	False	False	False	False	False	False
ENSMUSG00000027434	Nkx2-2	False	True	False	False	False	False	True	False	False	False	False	False	False	False	False	False	False	False	False	False	False	True	False	False	False	False	False	False	False	False	False	False	False	False
ENSMUSG00000021614	Vcan	False	False	False	False	False	False	True	False	False	False	False	False	False	False	False	False	False	False	False	True	False	True	False	False	False	False	False	False	False	False	False	False	False	False
